# Supplementary material for: Social dominance mediates behavioral adaptation to chronic stress in a sex-specific manner
Source: eLife journal article supplement (doi:10.7554/elife.58723), 2020-10-09
Supplement: supp [file elife-58723-supp-v1.zip]

Archive with 5 entries (5 files):
- elife_poa_e58723_Figure_1_figure_supplement_1.pdf
- elife_poa_e58723_Figure_1_figure_supplement_2.pdf
- elife_poa_e58723_Figure_3_figure_supplement_1.pdf
- elife_poa_e58723_Figure_3_figure_supplement_2.pdf
- elife_poa_e58723_Transparent_Reporting_File.docx
