# Supplementary figures and images for: Social dominance mediates behavioral adaptation to chronic stress in a sex-specific manner
Source: eLife journal article supplement (doi:10.7554/elife.58723), 2020-10-09

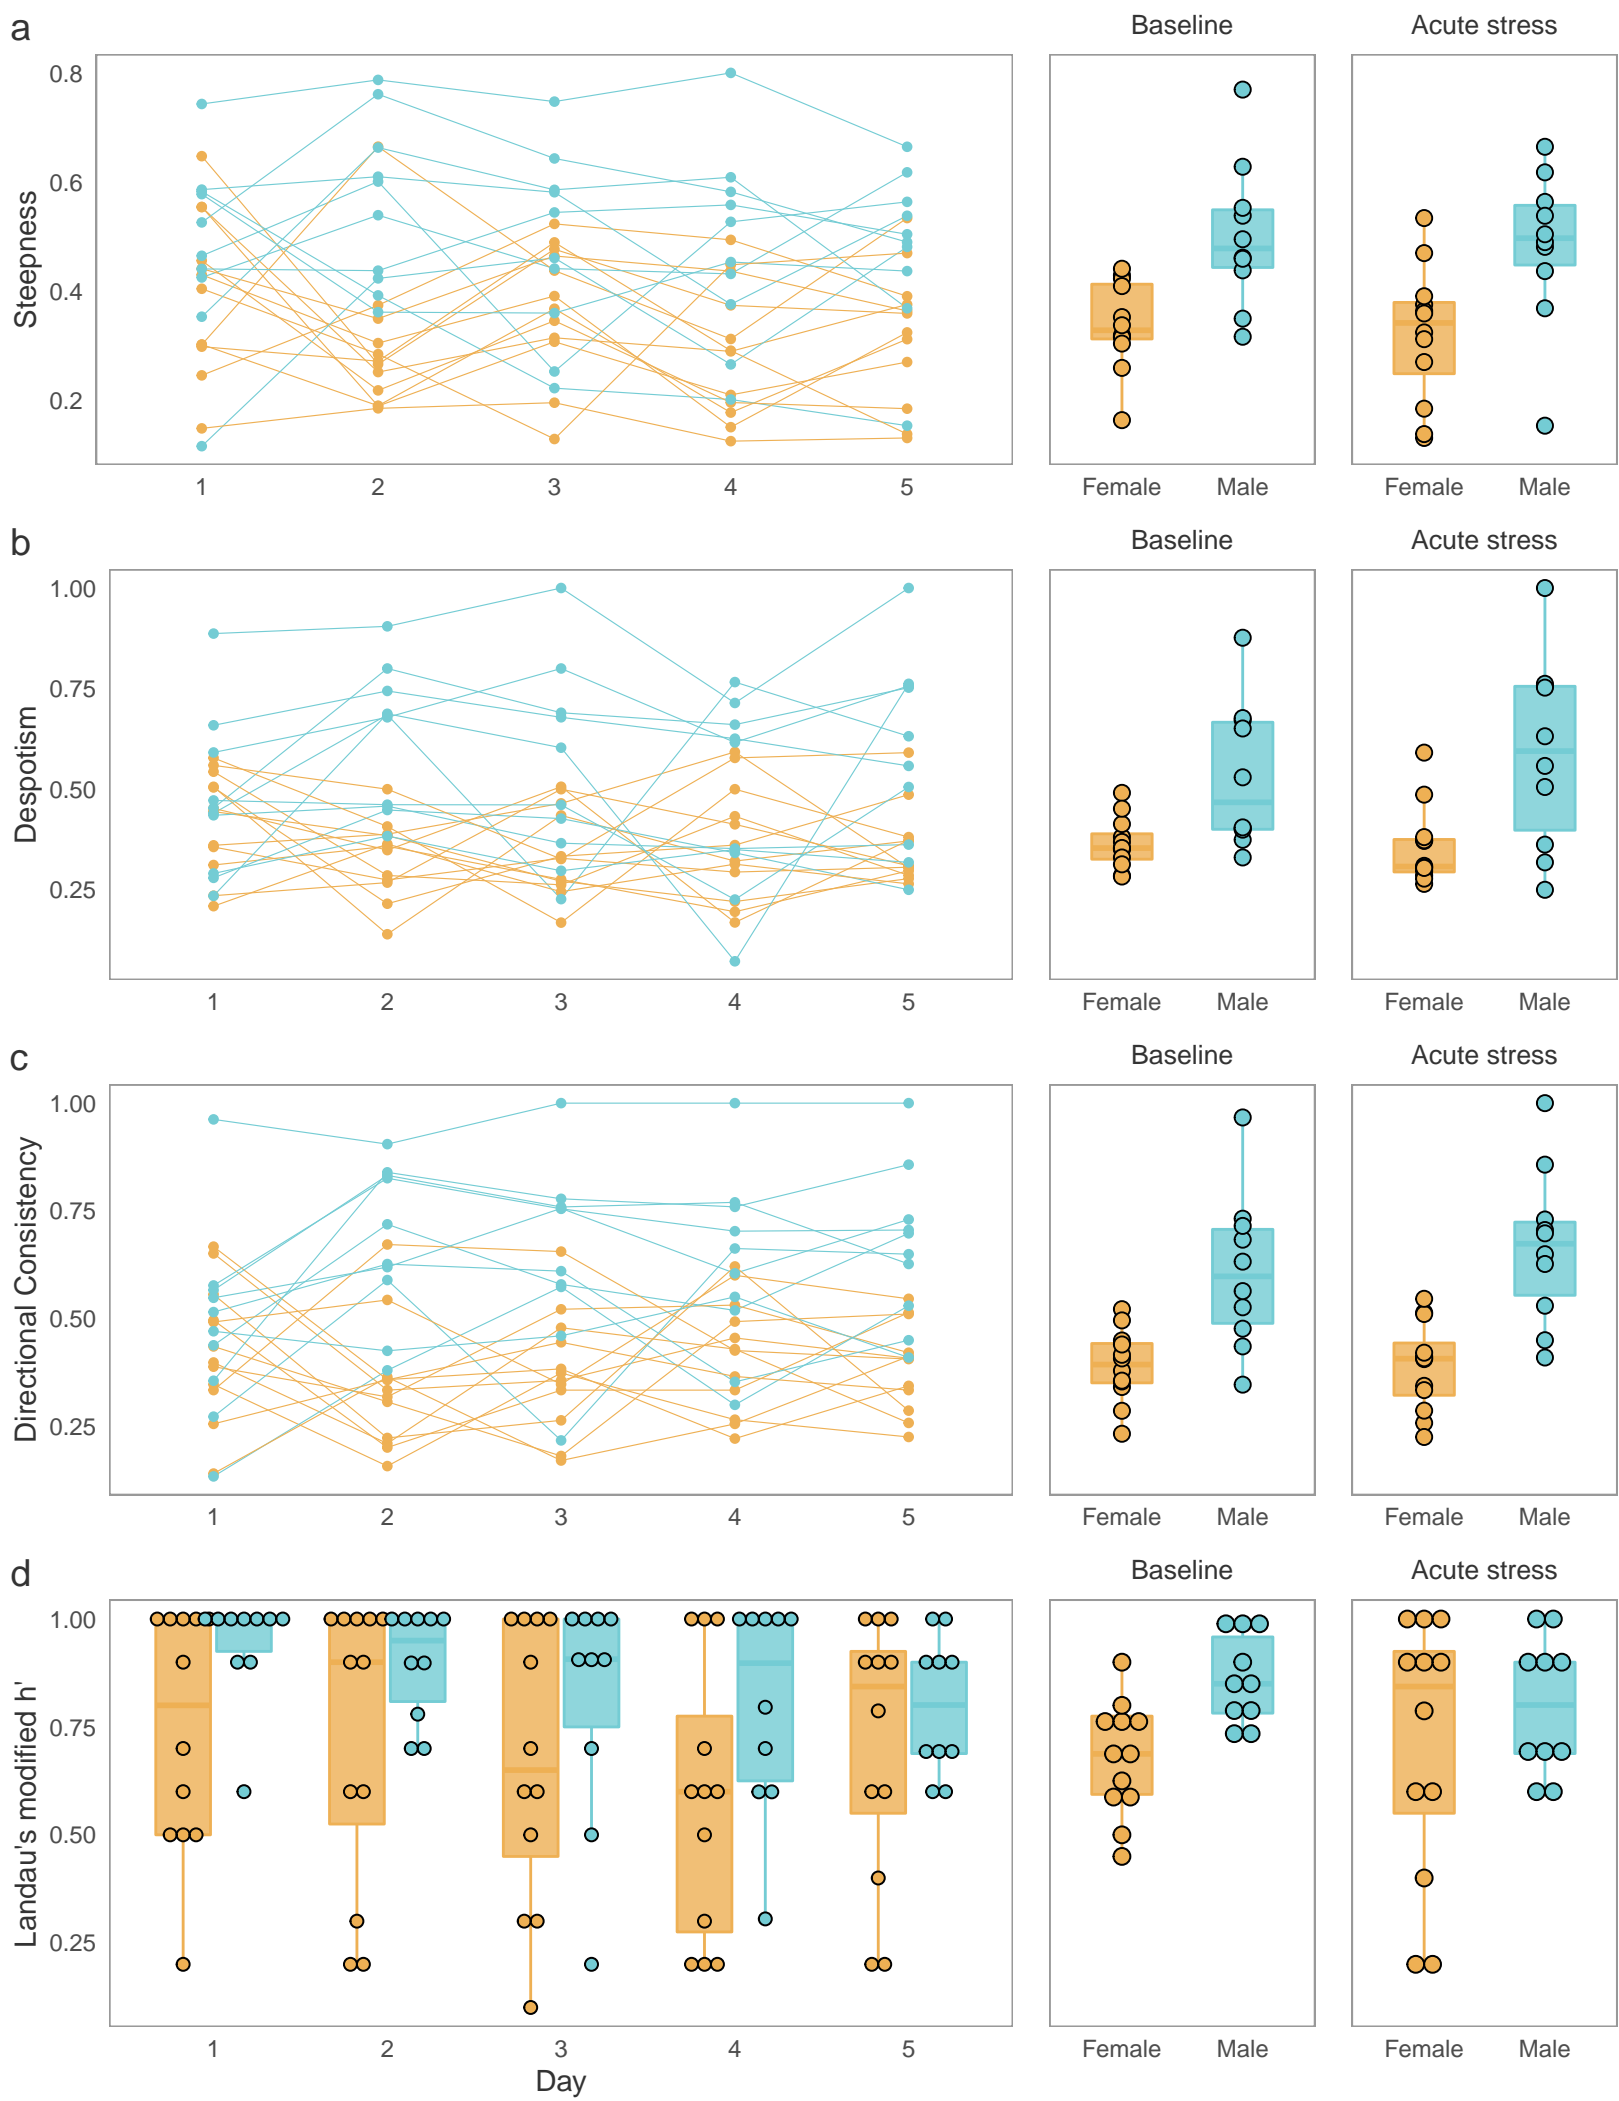

Supplement: supp [file elife-58723-supp-v1.zip › elife_poa_e58723_Figure_1_figure_supplement_1.pdf]

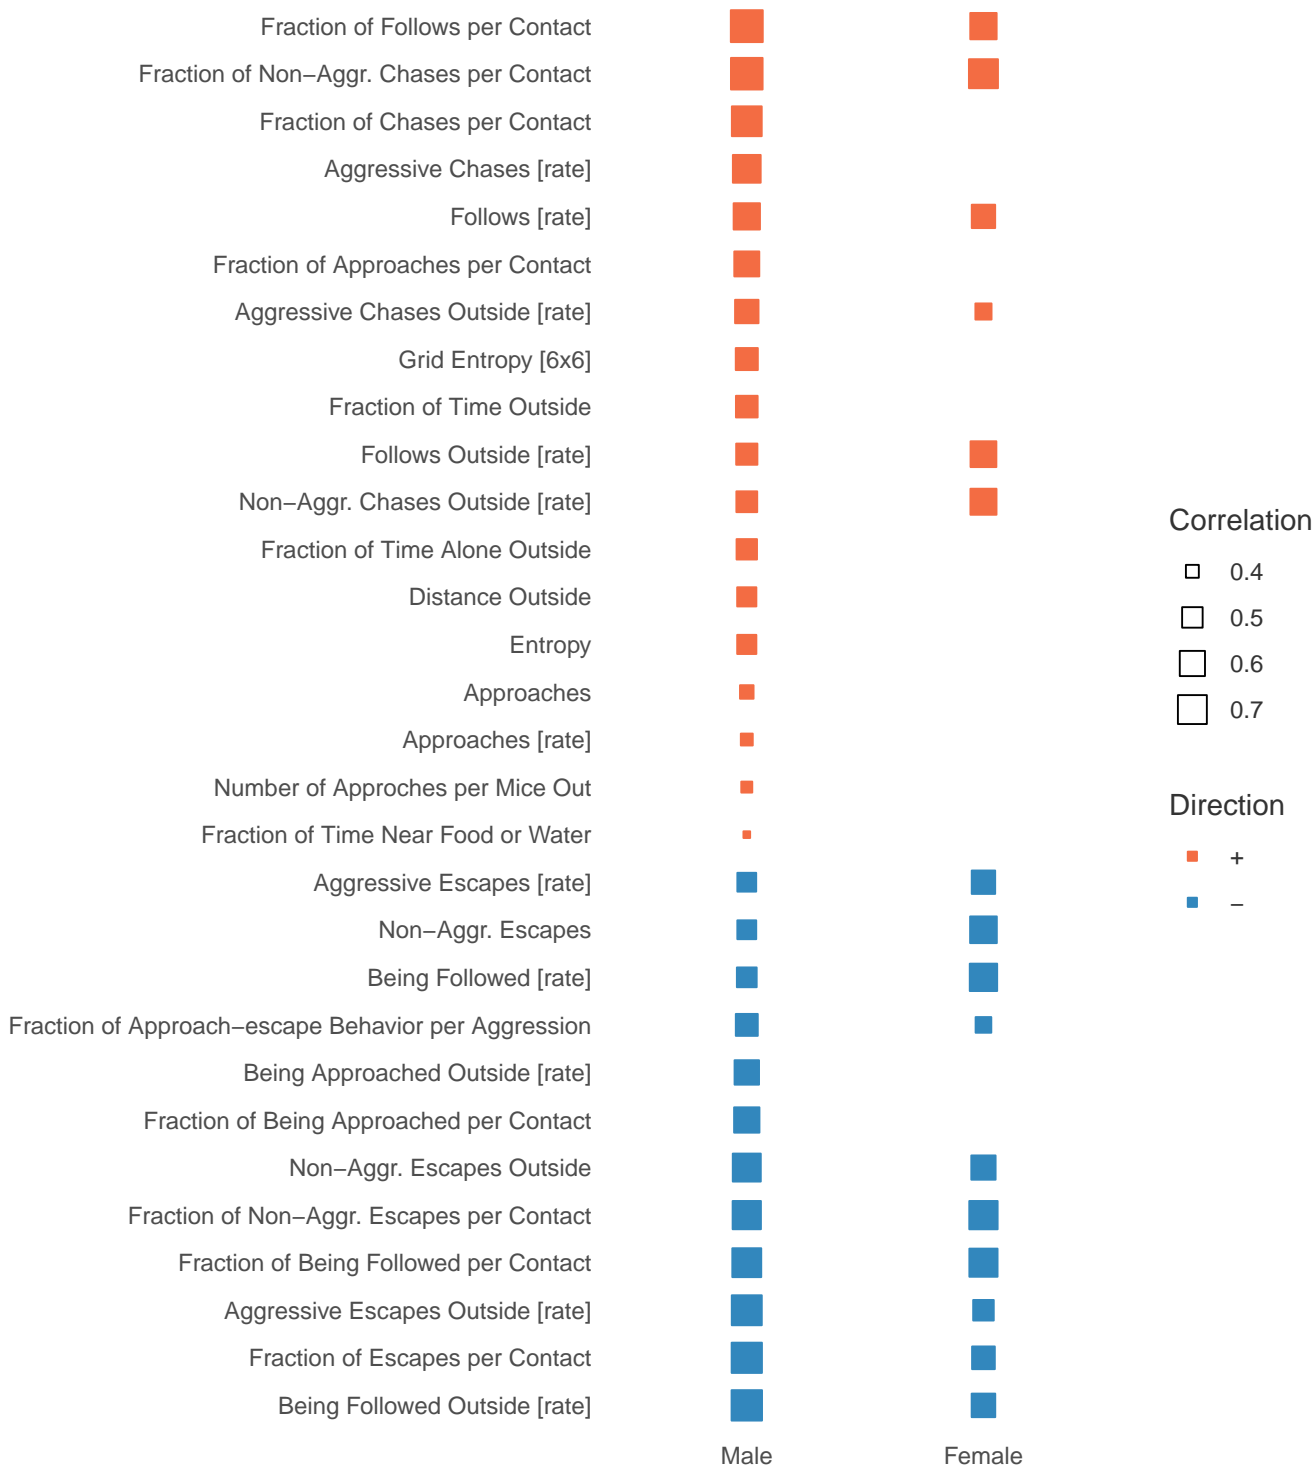

Supplement: supp [file elife-58723-supp-v1.zip › elife_poa_e58723_Figure_1_figure_supplement_2.pdf]

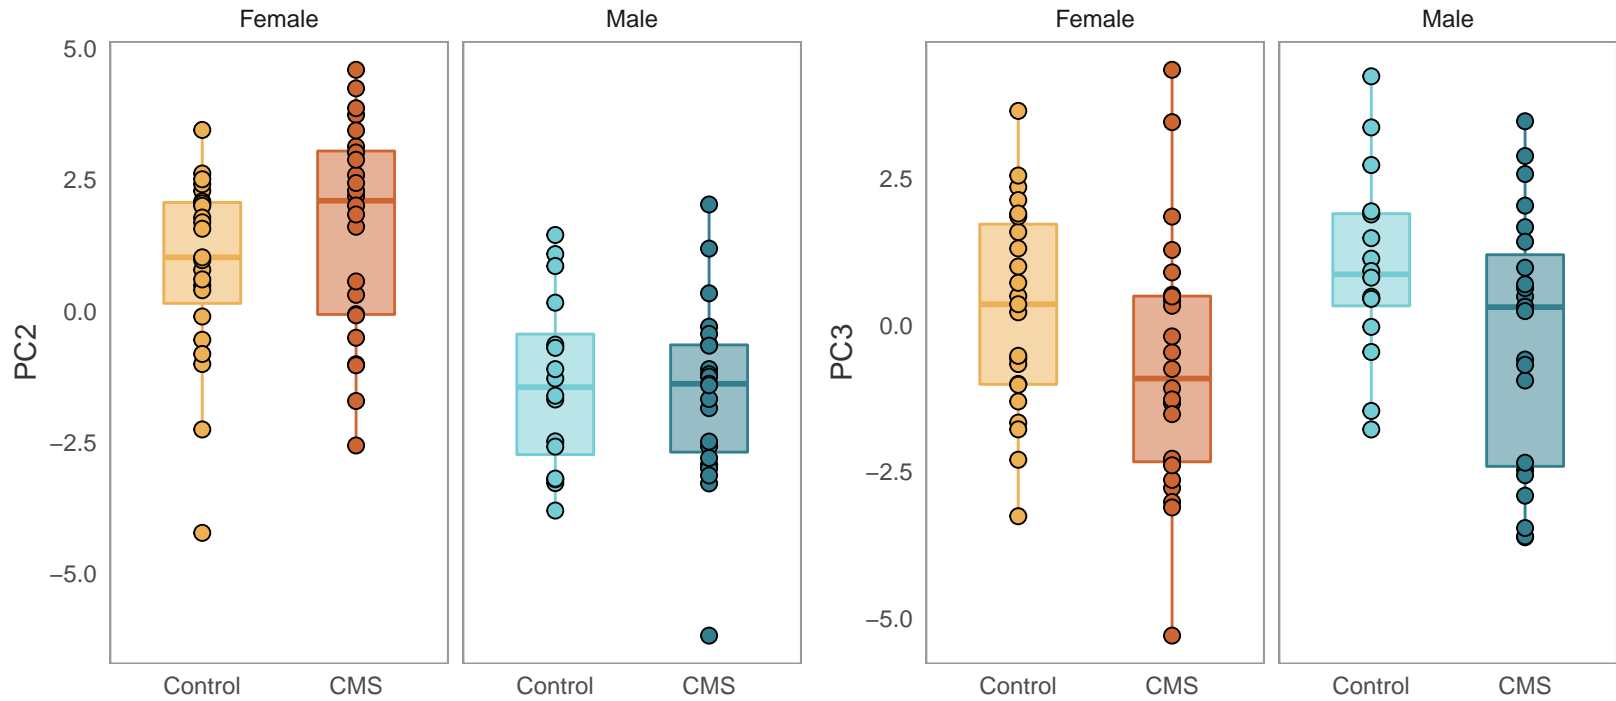

Supplement: supp [file elife-58723-supp-v1.zip › elife_poa_e58723_Figure_3_figure_supplement_1.pdf]

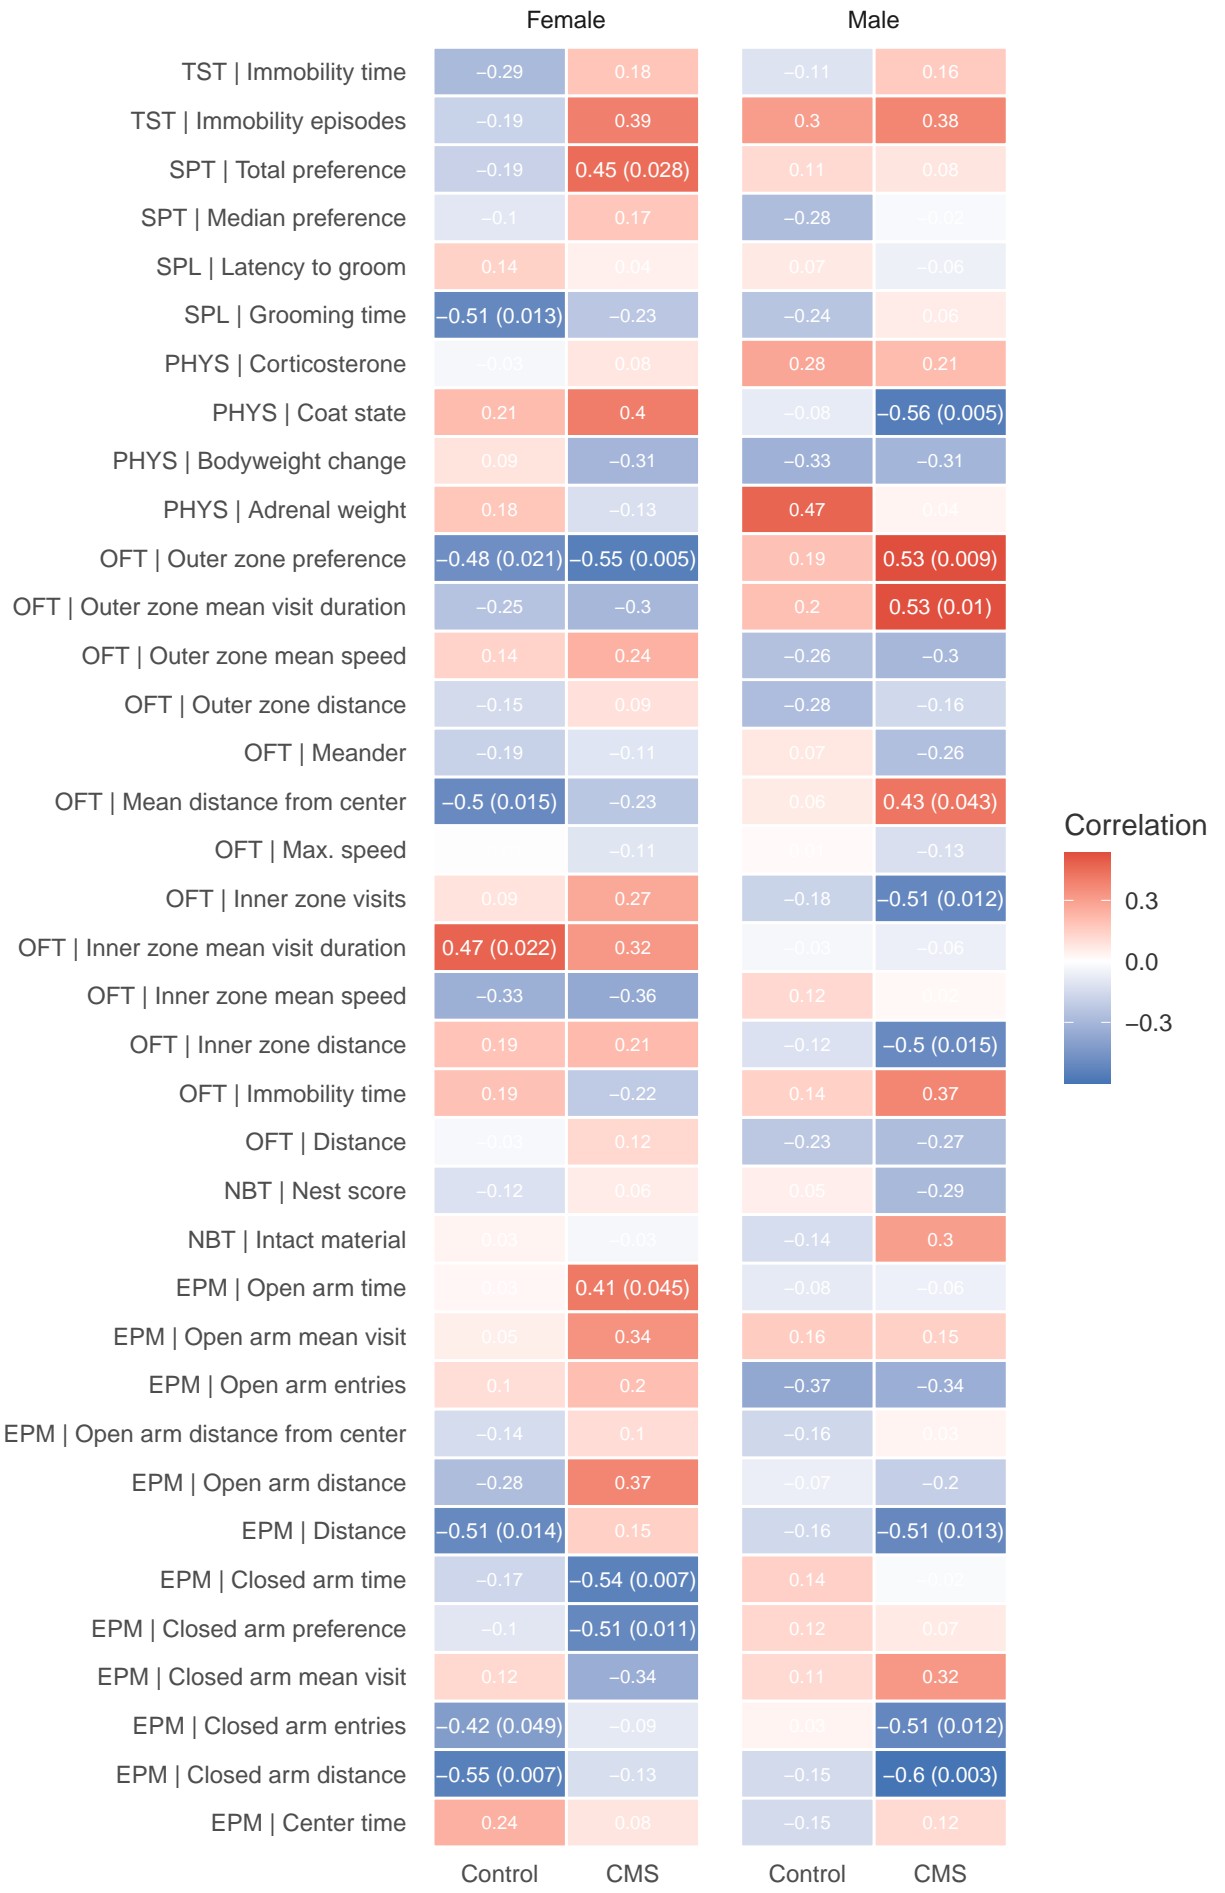

Supplement: supp [file elife-58723-supp-v1.zip › elife_poa_e58723_Figure_3_figure_supplement_2.pdf]
